# Supplementary material for: Evaluation of Physically and/or Chemically Modified Chitosan Hydrogels for Proficient Release of Insoluble Nystatin in Simulated Fluids
Source: MDPI journal article supplement (doi:10.3390/gels8080495), 2022-08-10
Supplement: s1 [file s1]

## Supplementary Materials

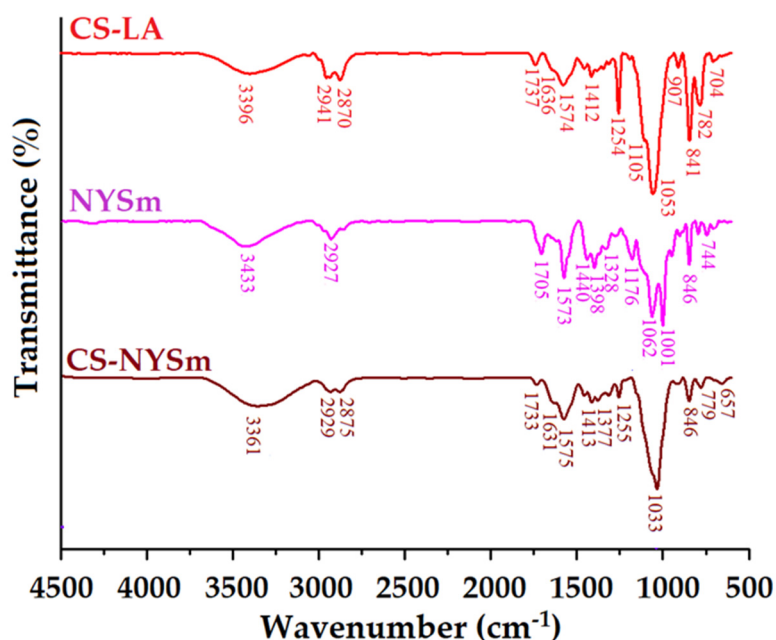

**Figure S1.** FTIR spectra of drug-free chitosan film (CS-LA), micronized nystatin (NYSm) and NYSm loaded chitosan film (CS-NYSm).

The CS-LA confirms the appearance of electrostatic interactions between protonated chitosan  $\text{NH}_3^+$  groups and  $-\text{OOCCH}(\text{OH})\text{CH}_3$  carboxylate ions ( $1737\text{ cm}^{-1}$ ). Micronized nystatin shows specific absorption bands for  $\text{C}=\text{O}$  stretching vibrations (ester and carboxylic acid groups) and for the  $\text{C}=\text{C}$  polyenes units at  $1705\text{ cm}^{-1}$ , respectively at  $1573\text{ cm}^{-1}$  and  $846\text{ cm}^{-1}$ . NYSm dispersion into the CS matrix determine the displacement of the  $\text{C}=\text{O}$  characteristic band from  $1737\text{ cm}^{-1}$  (CS-LA) to  $1733\text{ cm}^{-1}$  (CS-NYSm), also the increase in intensity of band from  $1575\text{ cm}^{-1}$  ( $\text{C}=\text{C}$  band of NYS superimposed with CS amide/amine bands) [25].

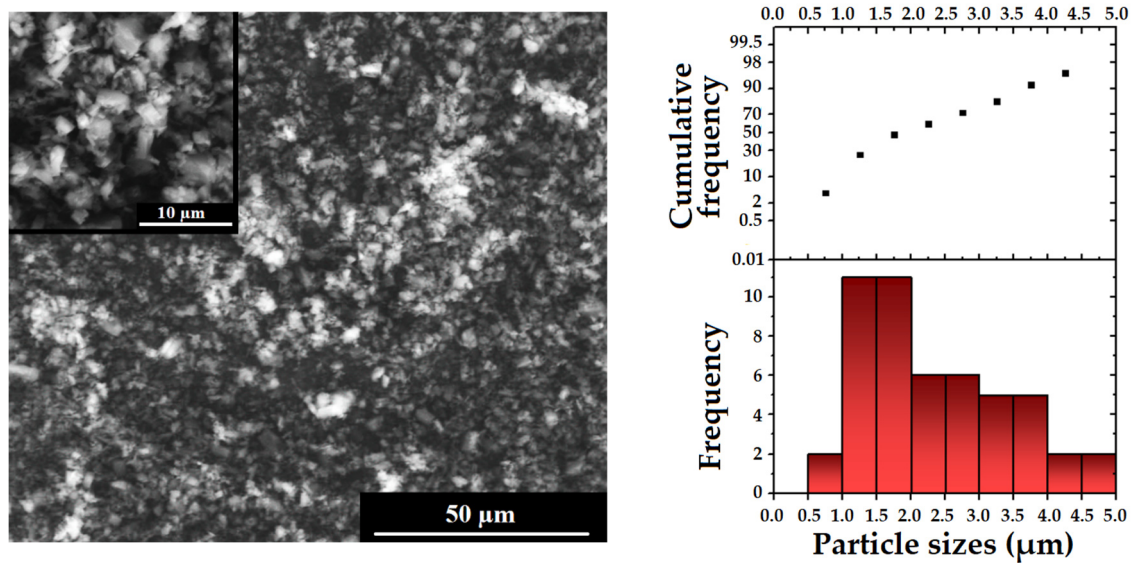

(a)

(b)

**Figure S2.** Micronized nystatin: (a) SEM images of micronized nystatin powder and (b) particle size distribution histogram for NYSm powder processed using NIH Image J software.

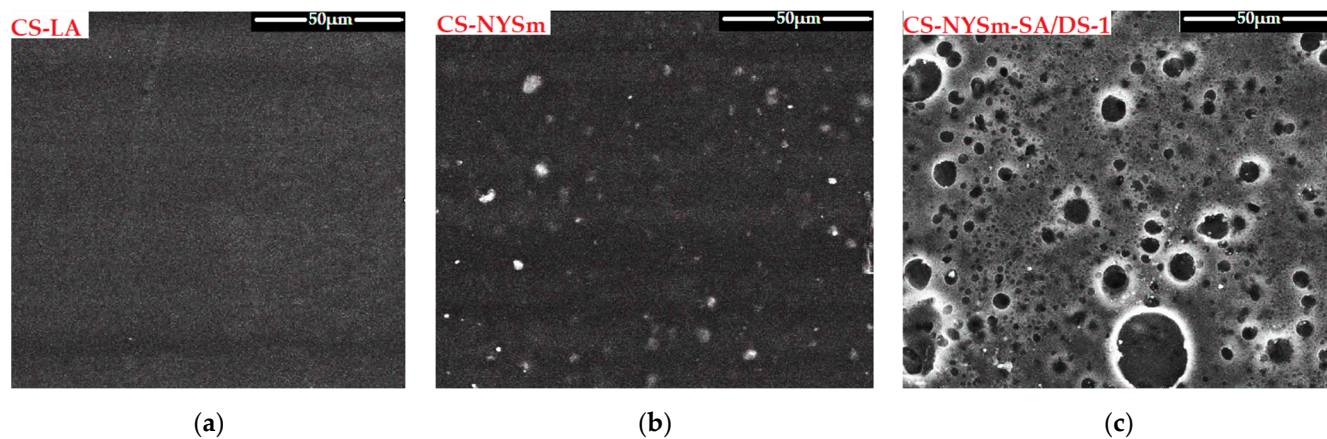

(a)

(b)

(c)

**Figure S3.** Surface morphology images of: (a) unmodified chitosan film (CS-LA); (b) micronized nystatin charged chitosan film (CS-NYSm); (c) DS cross-linked chitosan film (CS-NYSm-SA/DS-1).

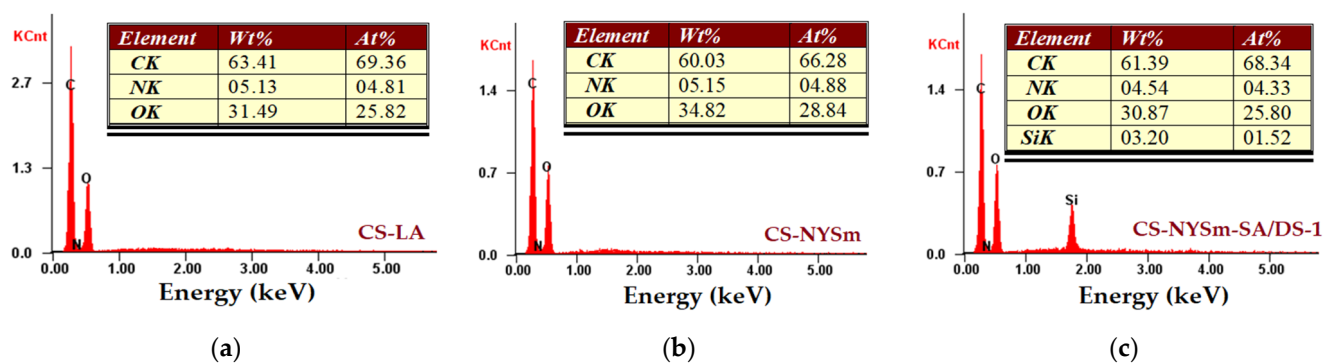

**Figure S4.** Chemical composition determined on the chitosan films surface by EDX for: (a) CS-LA, (b) CS-NYSm and (c) CS-NYSm-SA/DS-1 formulations.

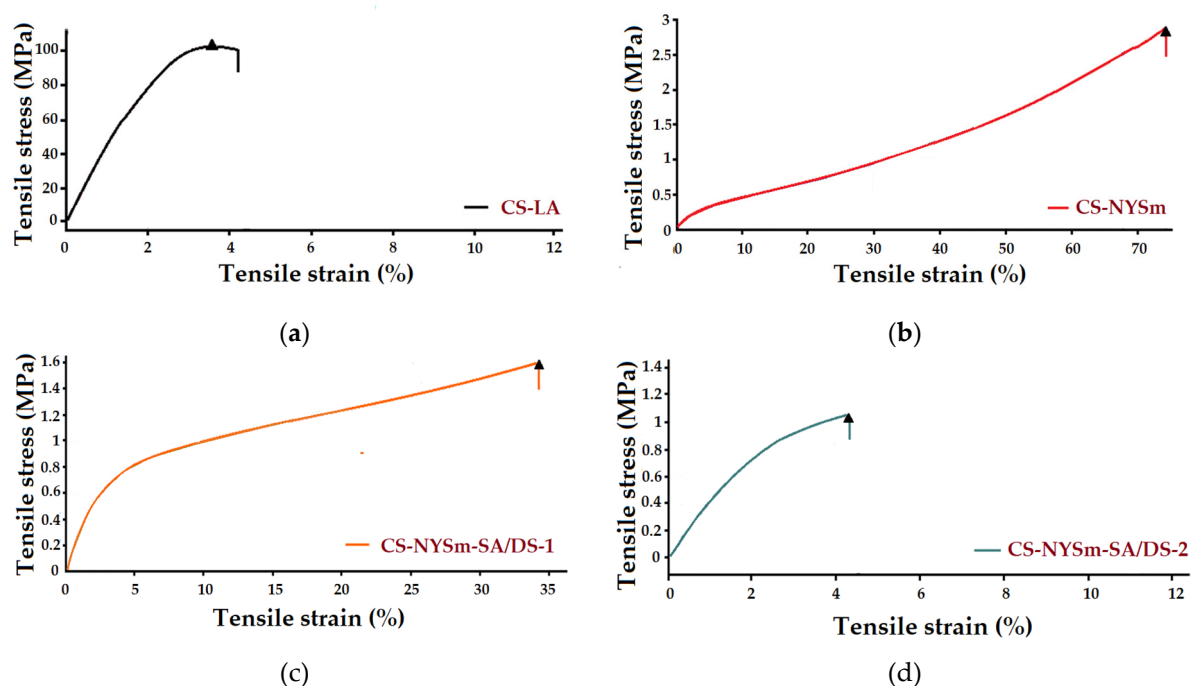

**Figure S5.** The characteristic stress-strain curves of the chitosan films: (a) CS-LA, (b) CS-NYSm, (c) CS-NYSm-SA/DS-1 and (d) CS-NYSm-SA/DS-2 films.

**Table S1.** Parameters <sup>1</sup> of the kinetic models (PFO - pseudo-first order, PSO - pseudo-second order and K-P - Korsmeyer-Peppas) and the swelling capacity values (%) of micronized nystatin loaded chitosan films after 5 h, respectively 24 h.

| Film code       | pH  | PFO<br>model parameters | PSO<br>model parameters       | K-P model parameters      | Swelling<br>capacity<br>after 5 h<br>(%) | Swelling<br>capacity<br>after 24 h<br>(%) |
|-----------------|-----|-------------------------|-------------------------------|---------------------------|------------------------------------------|-------------------------------------------|
| CS-NYSm         | 7.4 | $k_{s1} = 11.90$        | $k_{s2} = 6.25 \cdot 10^2$    | $k_p = 326.32$            | 323                                      | 330                                       |
|                 |     | $Se_1 = 338.84$         | $Se_2 = 338.84$               | $n = 1.04 \cdot 10^{-17}$ |                                          |                                           |
|                 |     | SD = 3.56               | SD = 3.42                     | SD = 5.33                 |                                          |                                           |
|                 | 4.2 | $k_{s1} = 0.65$         | $k_{s2} = 3.58 \cdot 10^{-3}$ | $k_p = 285.86$            | 387                                      | 425                                       |
|                 |     | $Se_1 = 356.59$         | $Se_2 = 366.43$               | $n = 0.05$                |                                          |                                           |
|                 |     | SD = 5.07               | SD = 2.90                     | SD = 3.91                 |                                          |                                           |
| CS-NYSm-SA/DS-1 | 7.4 | $k_{s1} = 10.27$        | $k_s = 1.88 \cdot 10^3$       | $k_p = 232.40$            | 231                                      | 232                                       |
|                 |     | $Se_1 = 238.00$         | $Se = 238.00$                 | $n = 9.97 \cdot 10^{-18}$ |                                          |                                           |
|                 |     | SD = 1.81               | SD = 1.81                     | SD = 2.54                 |                                          |                                           |
|                 | 4.2 | $k_{s1} = 10.06$        | $k_s = 1.90 \cdot 10^2$       | $k_p = 210.45$            | 210                                      | 211                                       |
|                 |     | $Se_1 = 211.20$         | $Se = 211.20$                 | $n = 7.58 \cdot 10^{-18}$ |                                          |                                           |
|                 |     | SD = 0.89               | SD = 0.89                     | SD = 0.92                 |                                          |                                           |
| CS-NYSm-SA/DS-2 | 7.4 | $k_{s1} = 10.83$        | $k_s = 4.01 \cdot 10^{-3}$    | $k_p = 335.80$            | 429                                      | 432                                       |
|                 |     | $Se_1 = 392.94$         | $Se = 412.28$                 | $n = 4.26 \cdot 10^{-2}$  |                                          |                                           |
|                 |     | SD = 9.94               | SD = 3.94                     | SD = 4.89                 |                                          |                                           |
|                 | 4.2 | $k_{s1} = 11.98$        | $k_s = 2.74 \cdot 10^{-3}$    | $k_p = 329.76$            | 471                                      | 500                                       |
|                 |     | $Se_1 = 422.14$         | $Se = 448.82$                 | $n = 0.06$                |                                          |                                           |
|                 |     | SD = 14.72              | SD = 9.15                     | SD = 3.62                 |                                          |                                           |

<sup>1</sup>  $k_{s1}$  and  $k_{s2}$  are constants for the swelling rate,  $Se_1$  and  $Se_2$  represents the theoretical equilibrium swelling capacity,  $k_p$  represents a constant which is polymeric network dependent and  $n$  is the diffusion coefficient of aqueous buffer solution into the films formulations (SD = standard deviation for 11 data points).

**Table S2.** Release efficiency (%) of NYSm from chitosan formulation (after 5 and 24 h) in immersion medium with pH 7.4, respectively 4.2 and the release kinetic models (PFO - pseudo-first order and K-P - Korsmeyer-Peppas) parameters

1

| Film code       | pH  | PFO model parameters | K-P model parameters | NYSm release efficiency after 5 h (%) | NYSm release efficiency after 24 h (%) |
|-----------------|-----|----------------------|----------------------|---------------------------------------|----------------------------------------|
| CS-NYSm         | 7.4 | $k_r = 0.02$         | $k_{pr} = 7.44$      | 51                                    | 57                                     |
|                 |     | $S_r = 46.85$        | $n = 0.34$           |                                       |                                        |
|                 |     | $SD = 0.96$          | $SD = 0.75$          |                                       |                                        |
|                 | 4.2 | $k_r = 0.01$         | $k_{pr} = 5.45$      | 60                                    | 75                                     |
|                 |     | $S_r = 57.35$        | $n = 0.43$           |                                       |                                        |
|                 |     | $SD = 0.68$          | $SD = 0.99$          |                                       |                                        |
| CS-NYSm-SA/DS-1 | 7.4 | $k_r = 0.05$         | $k_{pr} = 6.25$      | 23                                    | 24                                     |
|                 |     | $S_r = 21.67$        | $n = 0.24$           |                                       |                                        |
|                 |     | $SD = 0.56$          | $SD = 0.47$          |                                       |                                        |
|                 | 4.2 | $k_r = 0.04$         | $k_{pr} = 5.48$      | 24                                    | 33                                     |
|                 |     | $S_r = 23.23$        | $n = 0.27$           |                                       |                                        |
|                 |     | $SD = 0.51$          | $SD = 0.52$          |                                       |                                        |
| CS-NYSm-SA/DS-2 | 7.4 | $k_r = 0.06$         | $k_{pr} = 9.39$      | 33                                    | 34                                     |
|                 |     | $S_r = 31.88$        | $n = 0.23$           |                                       |                                        |
|                 |     | $SD = 0.63$          | $SD = 0.84$          |                                       |                                        |
|                 | 4.2 | $k_r = 0.04$         | $k_{pr} = 5.78$      | 25                                    | 35                                     |
|                 |     | $S_r = 23.95$        | $n = 0.27$           |                                       |                                        |
|                 |     | $SD = 0.50$          | $SD = 0.65$          |                                       |                                        |

<sup>1</sup>  $k_r$  is the release constants and  $S_r$  represents the theoretical drug release,  $k_{pr}$  is a gel characteristic constant which and  $n$  is the diffusion coefficient of NYSm ( $SD$  = standard deviation for 11 data points).

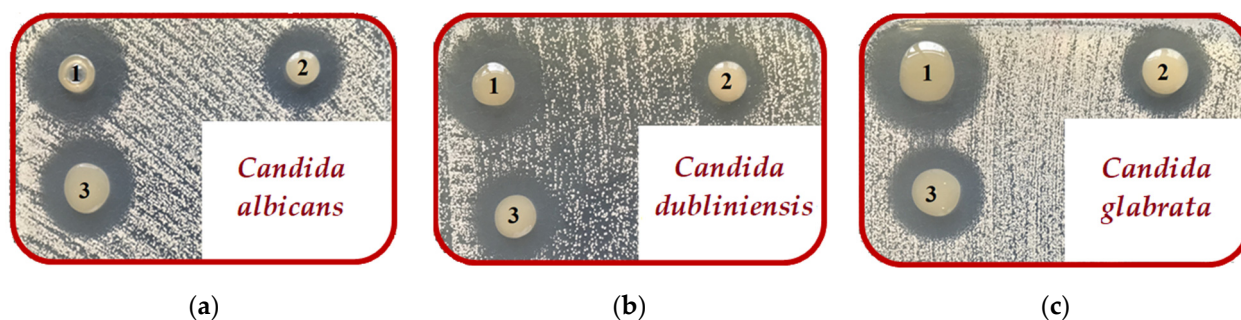

**Figure S6.** Antifungal effect against *Candida albicans*, *Candida dubliniensis* and *Candida glabrata* of: (a) CS-NYSm , (b) CS-NYSm-SA/DS-1 and (c) CS-NYSm-SA/DS-2 hydrogels.

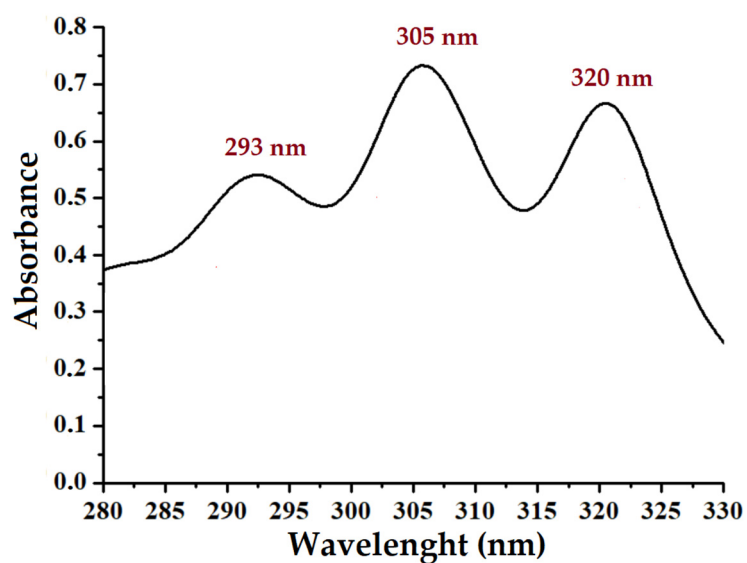

**Figure S7.** Identification of maximum absorbance wavelengths for micronized nystatin (concentration in solution of 20 mg/L).

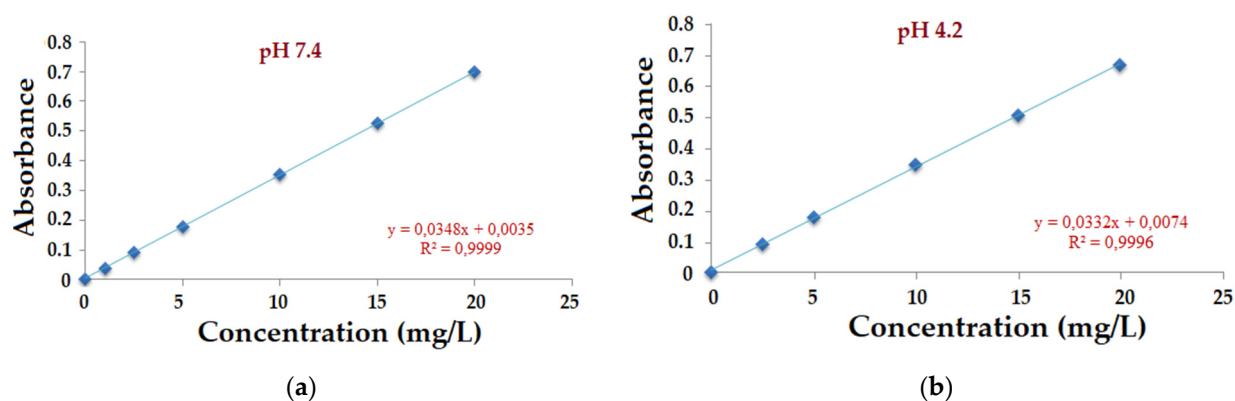

**Figure S8.** Graphical representation of calibration curves at a wavelength of 320 nm, in the concentration range 0-20 mg/L, for micronized nystatin (NYSm) at: (a) pH 7.4 and (b) pH 4.2.
